# Supplementary material for: Individual differences in ethics positions: The EPQ-5
Source: PLoS One. 2021 Jun 21;16(6):e0251989. doi: 10.1371/journal.pone.0251989 (PMC8216522; doi:10.1371/journal.pone.0251989)
Supplement: S2 Table — (DOCX) [file pone.0251989.s002.docx]

## S3: Study 3 Full Correlational Matrix for variables

|  | 1 | 2 |  | 3 | 4 | 5 | 6 | 7 | 8 | 9 | 10 | 11 | 12 | 13 | 14 |
| --- | --- | --- | --- | --- | --- | --- | --- | --- | --- | --- | --- | --- | --- | --- | --- |
| 1. Idealism | (.85) |  |  |  |  |  |  |  |  |  |  |  |  |  |  |
| 2. Relativism | .043** | (.81) |  |  |  |  |  |  |  |  |  |  |  |  |  |
| 3. Sex | -.221** | -.048** |  | (-) |  |  |  |  |  |  |  |  |  |  |  |
| 4. Age | .066** | -.157** |  | -0.008 | (-) |  |  |  |  |  |  |  |  |  |  |
| 5. Harm | .562** | .037** |  | -.286** | .113** | (-.71) |  |  |  |  |  |  |  |  |  |
| 6. Fairness | .392** | .064** |  | -.115** | .060** | .545** | (.67) |  |  |  |  |  |  |  |  |
| 7. Loyalty | -.086** | -.138** |  | .037** | .054** | -0.019 | -.115** | (.72) |  |  |  |  |  |  |  |
| 8. Authority | -.105** | -.209** |  | 0.012 | .128** | -.094** | -.202** | .677** | (.76) |  |  |  |  |  |  |
| 9. Sanctity | .050** | -.323** |  | -.078** | .096** | .059** | -.132** | .556** | .659** | (.85) |  |  |  |  |  |
| 10. Self-Transcendence | .442** | .035* |  | -.193** | .165** | .553** | .453** | -0.014 | -.066** | 0.025 | (.72) |  |  |  |  |
| 11. Conservation | .114** | -.192** |  | -.037* | .196** | .104** | -0.016 | .483** | .575** | .574** | .392** | (.78) |  |  |  |
| 12. Openness | .073** | .174** |  | -.035* | 0.012 | .062** | .131** | -.084** | -.160** | -.177** | .375** | .080** | (.63) |  |  |
| 13. Self-enhancement | -.140** | -0.018 |  | -0.002 | -.122** | -.121** | -.059** | .241** | .232** | .134** | .072** | .324** | .356** | (.70) |  |
| 14. Hedonism | -0.014 | .230** |  | .049** | -.139** | -0.006 | .073** | -.072** | -.133** | -.235** | .119** | -0.018 | .409** | .304** | (-) |

Note: N = 8,638 for correlations between EPQ and MFQ, and N = 3,768 for correlations between EPQ and SVS.
